# Supplementary material for: By downregulating TIAM1 expression, microRNA-329 suppresses gastric cancer invasion and growth
Source: PubMed Central journal article supplement (PMC4627328; doi:10.18632/oncotarget.2755), 2015-02-19
Supplement: oncotarget-06-17559-s001.pdf [file oncotarget-06-17559-s001.pdf]

## SUPPLEMENTARY TABLES

**Supplementary Table S1: Summary of clinicopathological parameters of patients with gastric cancer**

|           | Clinicopathological parameters | Number of cases |
|-----------|--------------------------------|-----------------|
| Gender    | ≥ 60                           | 24              |
|           | < 60                           | 16              |
| Age       | Male                           | 22              |
|           | Female                         | 18              |
| Location  | Proximal                       | 27              |
|           | Body                           | 13              |
| TNM stage | I, II                          | 19              |
|           | III, IV                        | 21              |

**Supplementary Table S2: Primer sequence**

| Name      | Sequence (5'-3')        |
|-----------|-------------------------|
| miRNA-329 | GGGAACACACCTGGTTAAC     |
|           | CAGTGCGTGTCGTGGAGT      |
| U6 snRNA  | CTCGCTTCGGCAGCACATATACT |
|           | ACGCTTCACGAATTTGCGTGTC  |
| GAPDH     | AATGGGCAGCCGTTAGGAAA    |
|           | TGAAGGGGTCATTGATGGCA    |
| TIAM1     | GCATTCCTGTGA CTGAGCAG   |
|           | TCAGGAAGCCAATTCTCACG    |
